# Supplementary material for: Dental characteristics of patients with four different types of skeletal dysplasias
Source: PubMed Central journal article supplement (PMC10560164; doi:10.1007/s00784-023-05194-w), 2023-08-07
Supplement: 784_2023_5194_MOESM1_ESM.pdf [file 784_2023_5194_MOESM1_ESM.pdf]

## Supplementary Data

### Dental characteristics of patients with four different types of skeletal dysplasias

Worasap Tantibhaedhyankul<sup>1,2</sup>, Jenjira Tantrapornpong<sup>1</sup>, Nuttanun Yutchawit<sup>1</sup>, Thanakorn Theerapanon<sup>1</sup>, Narin Intarak<sup>1</sup>, Sernporn Thaweesapphithak<sup>1</sup>, Thantrira Porntaveetus<sup>1,\*</sup>, Vorasuk Shotelersuk<sup>3,4</sup>

<sup>1</sup>Center of Excellence in Genomics and Precision Dentistry, Department of Physiology, Faculty of Dentistry, Chulalongkorn University, Bangkok, 10330, Thailand

<sup>2</sup>Department of Prosthodontics, Faculty of Dentistry, Chulalongkorn University, Bangkok, 10330, Thailand

<sup>3</sup>Center of Excellence for Medical Genomics, Medical Genomics Cluster, Department of Pediatrics, Faculty of Medicine, Chulalongkorn University, Bangkok, 10330, Thailand

<sup>4</sup>Excellence Center for Genomics and Precision Medicine, King Chulalongkorn Memorial Hospital, the Thai Red Cross Society, Bangkok, 10330, Thailand

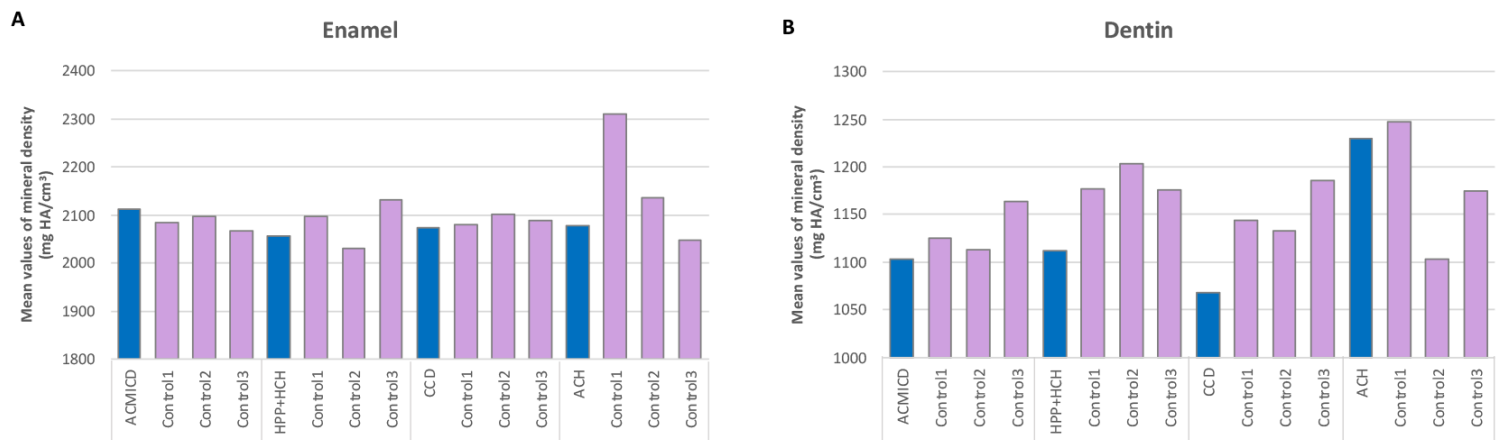

**Figure S1. Mean mineral density values of skeletal dysplasia teeth and controls.** The skeletal dysplasia teeth did not show significant differences in the mean mineral density values in the enamel (A) and dentin (B), compared with those in controls. ACMICD, acromicric dysplasia, HPP, hypophosphatasia, HCH, hypochondroplasia, CCD, cleidocranial dysplasia; ACH, achondroplasia.

**Table S1. Mineral density of teeth associated with skeletal dysplasia**

| Samples        | Mean mineral density values<br>(mg HA/cm <sup>3</sup> ) |           |
|----------------|---------------------------------------------------------|-----------|
|                | Enamel                                                  | Dentin    |
| <b>ACMICD</b>  | 2112.0840                                               | 1102.9993 |
| Control1       | 2084.0576                                               | 1124.8339 |
| Control2       | 2097.3752                                               | 1112.8022 |
| Control3       | 2066.6072                                               | 1163.8678 |
| <b>HPP+HCH</b> | 2057.3460                                               | 1112.0470 |
| Control1       | 2097.7424                                               | 1177.2770 |
| Control2       | 2029.9612                                               | 1203.8202 |
| Control3       | 2132.3510                                               | 1176.1040 |
| <b>CCD</b>     | 2074.0466                                               | 1067.5229 |
| Control1       | 2081.2104                                               | 1144.2094 |
| Control2       | 2101.3245                                               | 1132.6406 |
| Control3       | 2089.1091                                               | 1185.3594 |
| <b>ACH</b>     | 2078.3633                                               | 1229.7203 |
| Control1       | 2311.5560                                               | 1246.8953 |
| Control2       | 2135.9497                                               | 1103.5260 |
| Control3       | 2047.5955                                               | 1174.8892 |

ACMICD, acromicric dysplasia, HPP, hypophosphatasia, HCH, hypochondroplasia, CCD, cleidocranial dysplasia; ACH, achondroplasia.
